# Supplementary material for: Effect of intraperitoneal cannabidiol (CBD) injection on intestine microbiome profile in a mouse model
Source: Curr Genet. 2025 Sep 30;71(1):21. doi: 10.1007/s00294-025-01327-8 (PMC12484330; doi:10.1007/s00294-025-01327-8)
Supplement: Supplementary file 1 — Supplementary Material 1 [file 294_2025_1327_MOESM1_ESM.xlsx]

## Sheet: Table S1
Table S1. The taxonomic composition of the analyzed groups at the Phylum level (percentage abundance).
Phylum	CTR	0.2 mg	10 mg	20 mg	Average
Actinobacteriota	0.659662	0.723179	0.837113	0.562534	0.695622
Bacteroidota	23.1894	30.6592	28.4995	30.8503	28.2996
Campilobacterota	2.70758	0.815876	1.26267	1.21794	1.50102
Cyanobacteria	0.00815313	0.113256	0.0297407	0.109864	0.0652534
Deferribacterota	0	0.0104599	0.0100594	0.0203871	0.0102266
Desulfobacterota	1.54391	2.27738	2.56557	2.11724	2.12603
Firmicutes	68.2228	50.3109	61.2181	48.1502	56.9755
Proteobacteria	0.028536	0.30406	0.0306154	0.328082	0.172823
Verrucomicrobiota	3.64	14.7857	5.54664	16.6434	10.1539

## Sheet: Table S2
Table S2. The taxonomic composition of the analyzed groups at the Genus level (percentage abundance).
Genus	CTR	0.2mg	10mg	20mg	Average
A2	0.343914	0.612809	0.446985	0.14422	0.386982
Acetatifactor	0.0148239	0.00865651	0.00481099	0.00943849	0.00943247
Akkermansia	3.64	14.7857	5.54664	16.6434	10.1539
Alistipes	0.811236	1.02616	0.559825	1.09184	0.872266
Anaeroplasma	0.0385421	0.282419	0.436051	0.437946	0.298739
Anaerotruncus	0.110438	0.0432825	0.0481099	0.0577635	0.0648985
Atopostipes	0.00222358	0	0	0.0362438	0.00961684
Bacteroides	1.70437	3.01932	1.7652	3.00597	2.37371
Bilophila	0.0856079	0.108567	0.0949078	0.062294	0.0878442
Blautia	0.992458	0.28314	1.58807	0.240493	0.776039
Butyricicoccus	0.495117	0.440761	1.01731	0.536861	0.622511
Candidatus_Arthromitus	0	0.067088	0.0188066	0.0396416	0.0313841
Candidatus_Soleaferrea	0.0203828	0.017313	0.0279912	0.00717325	0.0182151
Candidatus_Stoquefichus	0.00148239	0.0703341	0.00612308	0.0230299	0.0252424
Clostridia_UCG_014	0.60852	0.595135	0.553702	0.812087	0.642361
Clostridia_vadinBB60_group	0.259047	0.375476	0.474976	0.457955	0.391864
Colidextribacter	1.39789	1.65484	1.71446	1.32479	1.52299
Coriobacteriaceae_UCG_002	0.00852373	0.127323	0.0262418	0.028693	0.0476953
Defluviitaleaceae_UCG_011	0.00148239	0.0501356	0	0.0279379	0.019889
Desulfovibrio	1.4205	2.01516	2.30403	1.98208	1.93044
Dubosiella	0	0.616416	0	1.73064	0.586764
Enterorhabdus	0.617044	0.579986	0.784192	0.460976	0.610549
Erysipelatoclostridium	0.00333537	0.464205	0.0258044	0.251441	0.186197
Eubacterium_brachy_group	0.0681898	0.0732196	0.0918462	0.0664469	0.0749257
Eubacterium_coprostanoligenes_group	0.119332	0.318487	0.492033	0.493444	0.355824
Eubacterium_nodatum_group	0	0.0205592	0.00568572	0.0135914	0.00995909
Eubacterium_siraeum_group	0.384309	0.13093	0.481537	0.24389	0.310166
Eubacterium_xylanophilum_group	1.25744	0.360688	1.4363	0.415293	0.867429
Faecalibaculum	0.211981	0.117224	0.545392	0.298256	0.293213
Family_XIII_UCG_001	0.0559601	0.0317405	0.0437363	0.0184994	0.0374841
Gastranaerophilales	0.00815313	0.113256	0.0297407	0.109864	0.0652534
GCA_900066575	1.56762	0.68711	0.899656	0.646725	0.950279
Helicobacter	2.70758	0.815876	1.26267	1.21794	1.50102
Incertae_Sedis	0.731929	0.68675	0.716838	0.701468	0.709246
Jeotgalicoccus	0.554783	0.0227233	0.0857232	0.144598	0.201957
Lachnoclostridium	2.14353	0.346621	0.507779	1.31346	1.07785
Lachnospiraceae_FCS020_group	0.0611485	0.102435	0.103218	0.0868341	0.0884089
Lachnospiraceae_NK4A136_group	31.1164	13.6423	21.6035	15.8767	20.5597
Lachnospiraceae_UCG_001	0.0819019	0.189	0.42293	0.112884	0.201679
Lachnospiraceae_UCG_006	1.51908	1.71002	4.01674	4.13783	2.84592
Lactobacillus	0.403209	0.192607	0.23049	0.152903	0.244803
Monoglobus	0.0255712	0.103878	0.019244	0.161209	0.0774757
Mucispirillum	0	0.0104599	0.0100594	0.0203871	0.0102266
Muribaculaceae	17.3903	20.209	23.2826	21.0422	20.481
Muribaculum	0.428039	2.66296	1.41399	1.88996	1.59874
NK4A214_group	0.047807	0.0627597	0.0586066	0.0630491	0.0580556
Not_Assigned	16.9422	18.8928	14.8563	10.0456	15.1842
Odoribacter	1.70919	0.80758	0.34989	0.86381	0.932618
Oscillibacter	1.34897	1.17007	1.44111	1.34744	1.3269
Parabacteroides	0.171957	0.600185	0.254108	0.648613	0.418716
Parasutterella	0.0196416	0.263302	0.0236176	0.222371	0.132233
Parvibacter	0.0340949	0.0158703	0.0266791	0.0728651	0.0373774
Peptococcus	0.0318713	0.0721376	0.0293033	0.0430395	0.0440879
Prevotellaceae_NK3B31_group	0.439528	1.22922	0.134708	1.5245	0.831991
Prevotellaceae_UCG_001	0.488447	0.992252	0.678787	0.654653	0.703535
Rikenellaceae_RC9_gut_group	0.0463246	0.112535	0.0603561	0.128741	0.0869891
Roseburia	0.693757	0.365377	0.619743	0.225013	0.475973
Ruminococcaceae	0.0378009	0.176737	0.0402374	0.0166117	0.0678468
Ruminococcus	0.267571	0.827057	1.03043	1.44069	0.891437
Staphylococcus	0.666704	0.00432825	0.083099	0.0868341	0.210241
Streptococcus	0.0315007	0.0461681	0.0481099	0.00566309	0.0328605
Tuzzerella	0.0103767	0.0634811	0.0774133	0.107976	0.0648118
UBA1819	0.0222358	0.0562673	0.0113714	0.0226524	0.0281317
UCG_005	0.00407657	0.0205592	0.0118088	0.00490801	0.0103381
UCG_009	0.0122297	0.0144275	0.0258044	0.0290705	0.020383
UCG_010	0.108955	0.172048	0.208622	0.245778	0.183851
uncultured	3.45137	4.24277	4.78388	3.62287	4.02522

## Sheet: Table S3
Table S3. Statistically significant differences in abundance at the phylum and the genus levels between the pairs of the study groups.
Comparision	0.2 mg vs CTR		10 mg vs CTRL		20 mg vs CTRL		10 mg vs 0.2 mg		20 mg vs 0.2 mg		20 mg vs 10 mg
Phylum level	log2FC	FDR	log2FC	FDR	log2FC	FDR	log2FC	FDR	log2FC	FDR	log2FC	FDR
Campilobacterota	-2.6	0.0199*	-1.7	0.1854	-2.6	0.0114*	0.9	0.4759	-0.001	0.9993	-0.9	0.4179
Cyanobacteria	2.6	0.0199*	1.1	0.6754	1.9	0.0831	-1.6	0.361	-0.8	0.9574	0.8	0.5198
Firmicutes	-1.1	0.0199*	-0.5	0.6754	-1.4	0.0046*	0.6	0.361	-0.3	0.9574	-0.9	0.0608
Proteobacteria	2.7	0.0199*	-0.1	0.9628	2.3	0.0407*	-2.8	0.0327*	-0.4	0.9799	2.4	0.0608
Genus level	log2FC	FDR	log2FC	FDR	log2FC	FDR	log2FC	FDR	log2FC	FDR	log2FC	FDR
Atopostipes	-0.9	0.6631	-0.7	0.9012	2.8	0.0309*	0.2	1	3.7	0.0206*	3.5	0.0233*
Candidatus_Arthromitus	4.8	0.0004*	2.8	0.1202	3.5	0.0201*	-1.9	0.2213	-1.3	0.6445	0.7	0.7407
Candidatus_Stoquefichus	4.2	0.0095*	1.2	0.7823	2.7	0.0943	-3	0.1388	-1.5	0.6445	1.5	0.551
Defluviitaleaceae_UCG_011	3.5	0.0095*	-0.7	0.9012	2.3	0.0943	-4.2	0.0042*	-1.2	0.6445	3	0.0969
Dubosiella	7.8	2.19E-05*	0.1	1	9.1	3.93E-06*	-7.7	0.0001*	1.3	0.7444	9	4.28E-06*
Erysipelatoclostridium	6	0.0034*	2	0.6406	4.7	0.0309*	-4.1	0.0818	-1.3	0.8047	2.8	0.3094
Eubacterium_nodatum_group	3.4	0.0281*	1.7	0.6406	2.2	0.1543	-1.6	0.3527	-1.2	0.6789	0.4	0.8465
Family_XIII_UCG_001	-0.9	0.3569	-0.4	0.9012	-1.8	0.0425*	0.5	0.8406	-0.9	0.6445	-1.4	0.2564
Gastranaerophilales	3.2	0.0281*	1.3	0.727	3.3	0.0309*	-1.9	0.2719	0.1	0.9983	2	0.3199
Jeotgalicoccus	-4.4	8.5E-06*	-2.5	0.0442*	-2.1	0.0309*	1.8	0.1532	2.2	0.0778	0.4	0.8238
Lachnospiraceae_NK4A136_group	-1.3	0.0491*	-0.7	0.6406	-1.3	0.0563	0.6	0.5072	0.04	0.9983	-0.6	0.5606
Mucispirillum	2.3	0.1414	2.2	0.278	3	0.0309*	-0.1	0.9773	0.7	0.8324	0.8	0.7199
Muribaculum	2.5	0.0008*	1.4	0.2049	1.7	0.0309*	-1.1	0.2384	-0.8	0.6445	0.4	0.7587
Odoribacter	-1.1	0.3334	-2.3	0.0442*	-1.1	0.3081	-1.3	0.2957	-0.03	1	1.2	0.4291
Parasutterella	3.3	0.0281*	-0.1	0.9866	2.9	0.0594	-3.4	0.05*	-0.4	0.9107	3	0.0969
Prevotellaceae_NK3B31_group	1.3	0.369	-2.6	0.1202	1.4	0.3327	-3.9	0.0042*	0.1	0.9983	3.9	0.0050*
Staphylococcus	-6.5	3.9E-07*	-2.8	0.0442*	-3.3	0.0129*	3.7	0.0042*	3.3	0.0235*	-0.5	0.8222
Streptococcus	0.5	0.6928	0.6	0.8099	-2.4	0.0309*	0.2	0.9242	-2.9	0.0206*	-3	0.0050*
Tuzzerella	2.2	0.0281*	2.4	0.0442*	2.6	0.0129*	0.2	0.9242	0.4	0.8401	0.3	0.8501
